# Supplementary material for: Vertical Transfer of Metabolites Detectable from Newborn’s Dried Blood Spot Samples Using UPLC-MS: A Chemometric Study
Source: MDPI journal article supplement (doi:10.3390/metabo12020094), 2022-01-20
Supplement: s1 [file s1]

# Supplementary tables and figures:

**Table S1.** Weakly transferred metabolites ( $0.1 < R \leq 0.3$ ) with associated biochemical taxonomy and estimated correlations.

| Biochemical                         | Taxonomy                          | $R_{m24-m1}$ | $R_{m1-c}$ | $R_{m24-c}$ |
|-------------------------------------|-----------------------------------|--------------|------------|-------------|
| beta-hydroxyisovalerylcarnitine     | Amino Acid                        | 0.42         | 0.30       | 0.35        |
| theobromine                         | Xenobiotics                       | 0.26         | 0.27       | 0.26        |
| arachidonoylcarnitine (C20:4)       | Lipid                             | 0.41         | 0.23       | 0.13        |
| carnitine                           | Lipid                             | 0.27         | 0.18       | 0.23        |
| docosahexaenoate (DHA; 22:6n3)      | Lipid                             | 0.09         | 0.18       | 0.02        |
| creatinine                          | Amino Acid                        | 0.50         | 0.17       | 0.17        |
| 5,6-dihydrouridine                  | Nucleotide                        | 0.36         | 0.17       | 0.09        |
| hexanoylcarnitine (C6)              | Lipid                             | 0.29         | 0.16       | 0.18        |
| 1-methylhistidine                   | Amino Acid                        | 0.03         | 0.15       | 0.10        |
| N-acetylmethionine                  | Amino Acid                        | 0.20         | 0.14       | 0.09        |
| 2-aminoheptanoate                   | Lipid                             | 0.33         | 0.14       | 0.11        |
| N2-acetyl.N6-methyllysine           | Amino Acid                        | 0.83         | 0.14       | 0.07        |
| 3-(4-hydroxyphenyl)lactate (HPLA)   | Amino Acid                        | 0.44         | 0.13       | 0.09        |
| 3-methoxytyrosine                   | Amino Acid                        | 0.40         | 0.13       | 0.14        |
| acetylcarnitine (C2)                | Lipid                             | 0.28         | 0.13       | 0.15        |
| gamma-glutamylphenylalanine         | Peptide                           | 0.30         | 0.13       | 0.10        |
| palmitoleoylcarnitine (C16:1)*      | Lipid                             | 0.16         | 0.13       | 0.07        |
| phenylalanine                       | Amino Acid                        | 0.25         | 0.13       | 0.10        |
| arginine                            | Amino Acid                        | 0.31         | 0.12       | 0.08        |
| caproate (6:0)                      | Lipid                             | 0.16         | 0.12       | 0.02        |
| propionylcarnitine (C3)             | Lipid                             | 0.31         | 0.12       | 0.16        |
| aconitate [cis or trans]            | Energy                            | 0.22         | 0.11       | 0.02        |
| palmitoylcarnitine (C16)            | Lipid                             | 0.28         | 0.11       | 0.09        |
| glutamine conjugate of C6H10O2 (1)* | Partially Characterized Molecules | 0.30         | 0.11       | 0.07        |
| citrate                             | Energy                            | 0.27         | 0.11       | 0.04        |
| cis-4-decenoylcarnitine (C10:1)     | Lipid                             | 0.25         | 0.11       | 0.02        |
| N-acetylcarnosine                   | Amino Acid                        | 0.54         | 0.11       | 0.05        |
| metronidazole                       | Xenobiotics                       | 0.00         | 0.11       | -0.01       |

\*: putative annotation.

**Table S2.** Non-transferred metabolites ( $R \leq 0.1$ ) with associated biochemical taxonomy and estimated correlations.

| Biochemical                           | Taxonomy                          | $R_{m24-m1}$ | $R_{m1-c}$ | $R_{m24-c}$ |
|---------------------------------------|-----------------------------------|--------------|------------|-------------|
| 5,6-dihydrothymine                    | Nucleotide                        | 0.40         | 0.10       | -0.04       |
| hexanoylglutamine                     | Lipid                             | 0.23         | 0.10       | 0.24        |
| (R)-3-hydroxybutyrylcarnitine         | Lipid                             | 0.09         | 0.10       | 0.08        |
| lysine                                | Amino Acid                        | 0.30         | 0.09       | 0.04        |
| theanine                              | Xenobiotics                       | 0.54         | 0.09       | 0.04        |
| 2-aminooctanoate                      | Lipid                             | 0.21         | 0.09       | 0.09        |
| biliverdin                            | Cofactors and Vitamins            | 0.45         | -0.09      | -0.06       |
| glutamine conjugate of C6H10O2 (2)*   | Partially Characterized Molecules | 0.23         | 0.09       | 0.00        |
| linoleoylcarnitine (C18:2)*           | Lipid                             | 0.31         | 0.09       | 0.05        |
| hydroxycotinine                       | Xenobiotics                       | 0.75         | -0.09      | 0.00        |
| gamma-glutamylglutamate               | Peptide                           | 0.24         | 0.09       | 0.00        |
| methyl glucopyranoside (alpha + beta) | Xenobiotics                       | 0.63         | -0.09      | -0.02       |
| 3-methylcytidine                      | Nucleotide                        | 0.61         | 0.09       | 0.06        |
| gamma-glutamylglutamine               | Peptide                           | 0.26         | -0.09      | -0.01       |
| suberoylcarnitine (C8-DC)             | Lipid                             | 0.22         | 0.09       | 0.02        |
| linoleate (18:2n6)                    | Lipid                             | 0.12         | -0.08      | -0.09       |
| 3-methoxycatechol sulfate (2)         | Xenobiotics                       | 0.29         | 0.08       | 0.03        |
| lidocaine                             | Xenobiotics                       | 0.03         | 0.08       | 0.01        |
| octadecanedioylcarnitine (C18-DC)*    | Lipid                             | 0.44         | 0.08       | 0.02        |
| thiopropine                           | Xenobiotics                       | 0.27         | 0.08       | -0.01       |
| undecenoylcarnitine (C11:1)           | Lipid                             | 0.25         | 0.08       | 0.14        |
| tryptophan                            | Amino Acid                        | 0.32         | 0.08       | 0.09        |
| arabitol/xylitol                      | Carbohydrate                      | 0.26         | 0.08       | 0.08        |
| hydroxy-N6,N6,N6-trimethyllysine*     | Amino Acid                        | 0.24         | 0.08       | 0.09        |
| N2,N2-dimethylguanosine               | Nucleotide                        | 0.56         | 0.07       | 0.13        |
| 3-hydroxyhexanoate                    | Lipid                             | 0.10         | 0.07       | -0.01       |
| octadecenedioylcarnitine (C18:1-DC)*  | Lipid                             | 0.29         | 0.07       | 0.06        |
| 7-methylguanine                       | Nucleotide                        | 0.59         | 0.07       | 0.16        |
| gamma-glutamylvaline                  | Peptide                           | 0.39         | 0.07       | 0.05        |
| cysteine                              | Amino Acid                        | 0.43         | -0.07      | -0.06       |
| cortisol                              | Lipid                             | 0.30         | -0.07      | -0.01       |
| 3,4-methyleneheptanoate               | Xenobiotics                       | 0.22         | 0.07       | 0.03        |
| 5-hydroxylysine                       | Amino Acid                        | 0.13         | -0.07      | 0.00        |
| 2-ketocaprylate                       | Amino Acid                        | 0.10         | 0.07       | 0.03        |
| myristoleoylcarnitine (C14:1)*        | Lipid                             | 0.07         | 0.07       | 0.04        |
| isovalerylcarnitine (C5)              | Amino Acid                        | 0.32         | 0.07       | -0.03       |
| N-acetylphenylalanine                 | Amino Acid                        | 0.62         | 0.07       | 0.12        |
| nisinate (24:6n3)                     | Lipid                             | 0.28         | -0.07      | -0.02       |
| 3-methylcrotonylglycine               | Amino Acid                        | 0.38         | -0.06      | -0.09       |
| 1-carboxyethylvaline                  | Amino Acid                        | 0.22         | 0.06       | 0.05        |
| dihydroorotate                        | Nucleotide                        | 0.28         | -0.06      | -0.01       |
| dimethylarginine (ADMA + SDMA)        | Amino Acid                        | 0.41         | 0.06       | 0.07        |
| methionine sulfone                    | Amino Acid                        | 0.65         | 0.06       | 0.02        |
| N-acetyl-1-methylhistidine*           | Amino Acid                        | 0.61         | 0.06       | 0.03        |
| 3-hydroxybutyrylglycine               | Lipid                             | 0.21         | -0.06      | -0.06       |
| tridecenedioate (C13:1-DC)*           | Lipid                             | 0.27         | 0.06       | -0.03       |

|                                             |                                   |       |       |       |
|---------------------------------------------|-----------------------------------|-------|-------|-------|
| succinylcarnitine (C4-DC)                   | Energy                            | 0.48  | 0.06  | 0.17  |
| prolylglycine                               | Peptide                           | 0.19  | 0.06  | 0.06  |
| gamma-glutamylglycine                       | Peptide                           | 0.54  | -0.06 | -0.03 |
| N-formylmethionine                          | Amino Acid                        | 0.63  | 0.06  | 0.09  |
| 2-hydroxylaurate                            | Lipid                             | 0.28  | 0.05  | -0.01 |
| 4-guanidinobutanoate                        | Amino Acid                        | 0.31  | -0.05 | 0.00  |
| alpha-ketoglutarate                         | Energy                            | 0.44  | 0.05  | 0.04  |
| spermine                                    | Amino Acid                        | -0.01 | 0.05  | 0.02  |
| 2-hydroxypalmitate                          | Lipid                             | 0.07  | 0.05  | -0.01 |
| glutamine                                   | Amino Acid                        | 0.36  | 0.05  | 0.05  |
| 2-hydroxyibuprofen                          | Xenobiotics                       | 0.18  | 0.05  | -0.07 |
| 4-hydroxyhippurate                          | Xenobiotics                       | 0.17  | -0.05 | -0.02 |
| 3-methylhistidine                           | Amino Acid                        | 0.02  | 0.05  | 0.02  |
| 6-hydroxyindole sulfate                     | Xenobiotics                       | 0.41  | -0.05 | 0.01  |
| cytosine                                    | Nucleotide                        | 0.15  | -0.05 | -0.05 |
| 2-aminoadipate                              | Amino Acid                        | 0.49  | -0.05 | -0.01 |
| 3-hydroxykynurenine                         | Amino Acid                        | 0.37  | 0.05  | 0.03  |
| glycine conjugate of C10H14O2 (1)*          | Partially Characterized Molecules | 0.33  | 0.05  | 0.03  |
| 7-HOCA                                      | Lipid                             | 0.27  | 0.05  | 0.07  |
| 3-(N-acetyl-L-cystein-S-yl) acetaminophen   | Xenobiotics                       | -0.02 | -0.05 | 0.01  |
| N-acetyltryptophan                          | Amino Acid                        | 0.86  | -0.05 | -0.03 |
| 2R,3R-dihydroxybutyrate                     | Lipid                             | 0.33  | 0.05  | 0.02  |
| propionylglycine (C3)                       | Lipid                             | 0.48  | 0.05  | -0.02 |
| S-methylmethionine                          | Amino Acid                        | 0.08  | -0.05 | -0.04 |
| isovalerylglycine                           | Amino Acid                        | 0.41  | 0.05  | -0.02 |
| iminodiacetate (IDA)                        | Xenobiotics                       | 0.23  | 0.05  | 0.06  |
| quinat                                      | Xenobiotics                       | 0.58  | 0.05  | 0.00  |
| palmitoyl ethanolamide                      | Lipid                             | 0.16  | 0.05  | -0.04 |
| guanosine                                   | Nucleotide                        | -0.01 | -0.05 | 0.00  |
| (14 or 15)-methylpalmitate (a17:0 or i17:0) | Lipid                             | 0.09  | 0.05  | 0.02  |
| 3-methyl-2-oxobutyrate                      | Amino Acid                        | 0.30  | 0.05  | -0.01 |
| histidine                                   | Amino Acid                        | 0.24  | -0.05 | -0.05 |
| proline                                     | Amino Acid                        | 0.30  | 0.05  | 0.02  |
| gamma-glutamyl-2-aminobutyrate              | Peptide                           | 0.10  | -0.04 | 0.02  |
| 5-methylthioadenosine (MTA)                 | Amino Acid                        | 0.24  | 0.04  | 0.00  |
| N6-acetyllysine                             | Amino Acid                        | 0.48  | 0.04  | 0.01  |
| N-acetylleucine                             | Amino Acid                        | 0.18  | -0.04 | 0.05  |
| (2 or 3)-decenoate (10:1n7 or n8)           | Lipid                             | 0.12  | 0.04  | 0.03  |
| 4-hydroxy-2-oxoglutaric acid                | Lipid                             | 0.40  | -0.04 | 0.01  |
| 3beta-hydroxy-5-cholestenoate               | Lipid                             | 0.33  | -0.04 | -0.02 |
| alpha-ketobutyrate                          | Amino Acid                        | 0.25  | -0.04 | -0.08 |
| thymol sulfate                              | Xenobiotics                       | 0.04  | -0.04 | 0.00  |
| phenyllactate (PLA)                         | Amino Acid                        | 0.24  | -0.04 | -0.03 |
| gamma-glutamylalanine                       | Peptide                           | 0.22  | -0.04 | -0.06 |
| hydroxyproline                              | Amino Acid                        | 0.15  | -0.04 | 0.02  |
| N-acetyl-2-aminooctanoate*                  | Lipid                             | 0.27  | -0.04 | 0.00  |
| metoprolol acid metabolite*                 | Xenobiotics                       | 0.26  | 0.04  | 0.03  |
| valylleucine                                | Peptide                           | 0.04  | 0.04  | 0.01  |
| allantoin                                   | Nucleotide                        | 0.27  | -0.04 | 0.02  |

|                                       |                        |       |       |       |
|---------------------------------------|------------------------|-------|-------|-------|
| cinnamoylglycine                      | Xenobiotics            | 0.33  | 0.04  | 0.00  |
| kynurenine                            | Amino Acid             | 0.32  | 0.04  | 0.02  |
| alpha-hydroxyisocaproate              | Amino Acid             | 0.23  | -0.04 | -0.08 |
| N-formylanthranilic acid              | Amino Acid             | 0.46  | 0.04  | -0.03 |
| leucine                               | Amino Acid             | 0.25  | 0.04  | 0.01  |
| glycerol 3-phosphate                  | Lipid                  | 0.19  | -0.04 | 0.02  |
| 6-oxopiperidine-2-carboxylate         | Amino Acid             | 0.36  | 0.04  | -0.04 |
| glycerophosphoethanolamine            | Lipid                  | 0.13  | -0.04 | 0.04  |
| choline                               | Lipid                  | 0.26  | 0.04  | 0.05  |
| oleoylcarnitine (C18)                 | Lipid                  | 0.28  | -0.04 | 0.03  |
| spermidine                            | Amino Acid             | 0.00  | 0.04  | 0.04  |
| dodecanedioate (C12)                  | Lipid                  | -0.01 | -0.03 | -0.02 |
| citalopram propionate*                | Xenobiotics            | 0.65  | 0.03  | 0.01  |
| 3-indoleglyoxylic acid                | Xenobiotics            | 0.63  | 0.03  | 0.01  |
| 4-hydroxyphenylacetate                | Amino Acid             | 0.39  | 0.03  | -0.08 |
| methyl indole-3-acetate               | Xenobiotics            | 0.37  | -0.03 | 0.03  |
| deoxycholic acid (12 or 24)-sulfate*  | Lipid                  | 0.37  | -0.03 | 0.11  |
| 2-hydroxy-4-(methylthio)butanoic acid | Amino Acid             | 0.25  | -0.03 | 0.17  |
| 3-phenylpropionate (hydrocinnamate)   | Xenobiotics            | 0.40  | -0.03 | -0.05 |
| N6,N6,N6-trimethyllysine              | Amino Acid             | 0.24  | -0.03 | 0.03  |
| gamma-glutamylhistidine               | Peptide                | 0.28  | -0.03 | -0.02 |
| 2-hydroxyacetaminophen sulfate*       | Xenobiotics            | 0.08  | 0.03  | 0.05  |
| phenylalanylhydroxyproline*           | Peptide                | 0.21  | 0.03  | 0.04  |
| vanillactate                          | Amino Acid             | 0.10  | 0.03  | -0.03 |
| 3-hydroxydecanoate                    | Lipid                  | 0.09  | -0.03 | -0.01 |
| glucuronate                           | Carbohydrate           | 0.30  | -0.03 | -0.01 |
| glutarate (C5-DC)                     | Lipid                  | 0.35  | 0.03  | -0.03 |
| indoleacetate                         | Amino Acid             | 0.43  | 0.03  | 0.02  |
| pipecolate                            | Amino Acid             | 0.52  | -0.03 | -0.02 |
| 16-hydroxypalmitate                   | Lipid                  | 0.13  | -0.03 | 0.11  |
| valine                                | Amino Acid             | 0.11  | 0.03  | 0.00  |
| gamma-glutamyltyrosine                | Peptide                | 0.19  | -0.03 | -0.07 |
| N-oleoylserine                        | Lipid                  | 0.42  | 0.03  | 0.04  |
| dihydroferulate                       | Xenobiotics            | 0.23  | -0.03 | -0.02 |
| butyrylcarnitine (C4)                 | Lipid                  | 0.54  | 0.03  | 0.06  |
| asparagine                            | Amino Acid             | 0.34  | 0.03  | -0.01 |
| threonine                             | Amino Acid             | 0.38  | 0.03  | 0.01  |
| inosine 5'-monophosphate (IMP)        | Nucleotide             | 0.15  | 0.03  | 0.08  |
| 3-amino-2-piperidone                  | Amino Acid             | 0.35  | -0.03 | 0.05  |
| 3-methylglutaconate                   | Amino Acid             | 0.76  | -0.03 | -0.03 |
| gamma-glutamylthreonine               | Peptide                | 0.35  | 0.03  | 0.00  |
| N1-Methyl-4-pyridone-3-carboxamide    | Cofactors and Vitamins | 0.23  | -0.03 | -0.01 |
| alpha-ketoglutaramate*                | Amino Acid             | 0.29  | -0.03 | 0.02  |
| betaine                               | Amino Acid             | 0.26  | -0.03 | -0.05 |
| 2-oxoarginine*                        | Amino Acid             | 0.26  | 0.03  | 0.03  |
| pyridoxate                            | Cofactors and Vitamins | 0.27  | -0.03 | 0.06  |
| 6-bromotryptophan                     | Amino Acid             | 0.58  | 0.03  | 0.04  |
| 3-hydroxyhippurate                    | Xenobiotics            | 0.25  | -0.03 | 0.03  |
| methionine sulfoxide                  | Amino Acid             | 0.23  | 0.03  | 0.05  |

|                                              |              |      |       |       |
|----------------------------------------------|--------------|------|-------|-------|
| phosphoethanolamine (PE)                     | Lipid        | 0.24 | 0.03  | -0.02 |
| uracil                                       | Nucleotide   | 0.13 | -0.03 | 0.05  |
| linolenate (18:3n3 or 3n6)                   | Lipid        | 0.50 | -0.03 | 0.08  |
| indolepropionate                             | Amino Acid   | 0.38 | -0.03 | 0.19  |
| N-palmitoylglycine                           | Lipid        | 0.20 | -0.03 | -0.01 |
| 2-piperidinone                               | Xenobiotics  | 0.33 | 0.02  | 0.08  |
| N-palmitoylserine                            | Lipid        | 0.25 | 0.02  | -0.02 |
| glutamate                                    | Amino Acid   | 0.26 | 0.02  | 0.04  |
| 1-methyladenosine                            | Nucleotide   | 0.49 | 0.02  | 0.04  |
| homocitrulline                               | Amino Acid   | 0.18 | 0.02  | 0.01  |
| 3-formylindole                               | Xenobiotics  | 0.48 | 0.02  | -0.03 |
| glycine                                      | Amino Acid   | 0.60 | 0.02  | -0.02 |
| citraconate/glutaconate                      | Energy       | 0.45 | -0.02 | 0.02  |
| N6,N6-dimethyllysine                         | Amino Acid   | 0.85 | -0.02 | -0.04 |
| N,N-dimethylalanine                          | Amino Acid   | 0.53 | -0.02 | -0.05 |
| tyrosine                                     | Amino Acid   | 0.28 | 0.02  | 0.05  |
| 1,2,3-benzenetriol sulfate (2)               | Xenobiotics  | 0.20 | -0.02 | -0.02 |
| 3-methylglutarylcarnitine (2)                | Amino Acid   | 0.73 | 0.02  | -0.01 |
| picolinoylglycine                            | Lipid        | 0.14 | -0.02 | -0.01 |
| 1-myristoylglycerol (14:0)                   | Lipid        | 0.11 | -0.02 | -0.01 |
| ornithine                                    | Amino Acid   | 0.27 | 0.02  | 0.01  |
| hydroxyasparagine                            | Amino Acid   | 0.63 | -0.02 | 0.03  |
| taurine                                      | Amino Acid   | 0.24 | 0.02  | 0.06  |
| N-acetylthearine                             | Xenobiotics  | 0.13 | 0.02  | 0.09  |
| indolelactate                                | Amino Acid   | 0.49 | 0.02  | -0.04 |
| N-acetylserine                               | Amino Acid   | 0.60 | -0.02 | -0.05 |
| arachidonate (20:4n6)                        | Lipid        | 0.10 | -0.02 | 0.07  |
| 1-carboxyethylphenylalanine                  | Amino Acid   | 0.19 | -0.02 | -0.09 |
| heptenedioate (C7:1-DC)*                     | Lipid        | 0.29 | 0.02  | -0.09 |
| 1,3,7-trimethylurate                         | Xenobiotics  | 0.44 | -0.02 | -0.01 |
| N-acetylglucosamine/N-acetylgalactosamine    | Carbohydrate | 0.12 | -0.02 | -0.11 |
| tartarate                                    | Xenobiotics  | 0.21 | -0.02 | -0.06 |
| caprate (10:0)                               | Lipid        | 0.09 | -0.02 | 0.00  |
| 13-HODE + 9-HODE                             | Lipid        | 0.14 | -0.02 | 0.08  |
| 3-hydroxyhexanoylcarnitine (1)               | Lipid        | 0.14 | 0.02  | 0.05  |
| N-acetylcitrulline                           | Amino Acid   | 0.58 | -0.01 | -0.03 |
| 21-hydroxypregnenolone disulfate             | Lipid        | 0.67 | 0.01  | -0.03 |
| cortisone                                    | Lipid        | 0.23 | 0.01  | 0.04  |
| N6-carboxymethyllysine                       | Carbohydrate | 0.27 | -0.01 | -0.04 |
| erythritol                                   | Xenobiotics  | 0.05 | -0.01 | -0.04 |
| N,N,N-trimethyl-alanylproline betaine (TMAP) | Amino Acid   | 0.21 | 0.01  | 0.05  |
| phenylpyruvate                               | Amino Acid   | 0.31 | -0.01 | -0.07 |
| 3-phosphoglycerate                           | Carbohydrate | 0.09 | 0.01  | 0.10  |
| 12-HETE                                      | Lipid        | 0.04 | -0.01 | -0.02 |
| gluconate                                    | Xenobiotics  | 0.46 | 0.01  | -0.02 |
| N-(2-furoyl)glycine                          | Xenobiotics  | 0.29 | -0.01 | 0.10  |
| creatine                                     | Amino Acid   | 0.29 | 0.01  | 0.04  |
| 8-methoxykynurenate                          | Amino Acid   | 0.41 | 0.01  | 0.09  |
| sphingosine                                  | Lipid        | 0.31 | -0.01 | -0.04 |

|                                        |                        |       |       |       |
|----------------------------------------|------------------------|-------|-------|-------|
| palmitamide (16:0)                     | Lipid                  | 0.45  | -0.01 | 0.02  |
| citrulline                             | Amino Acid             | 0.33  | 0.01  | -0.02 |
| indolin-2-one                          | Xenobiotics            | 0.47  | -0.01 | 0.00  |
| O-sulfo-L-tyrosine                     | Xenobiotics            | 0.55  | 0.01  | 0.02  |
| eicosapentaenoate (EPA; 20:5n3)        | Lipid                  | 0.10  | -0.01 | -0.03 |
| pyroglutamine*                         | Amino Acid             | 0.18  | 0.01  | 0.03  |
| vanillic acid glycine                  | Xenobiotics            | 0.08  | -0.01 | -0.04 |
| glycoursodeoxycholate                  | Lipid                  | 0.11  | -0.01 | 0.00  |
| sphinganine                            | Lipid                  | 0.37  | 0.01  | -0.08 |
| trans-urocanate                        | Amino Acid             | 0.14  | 0.01  | 0.02  |
| S-allylcysteine                        | Xenobiotics            | 0.10  | 0.01  | 0.02  |
| trigonelline (N'-methylnicotinate)     | Cofactors and Vitamins | 0.54  | -0.01 | 0.03  |
| phosphocholine                         | Lipid                  | 0.22  | -0.01 | 0.00  |
| 1-methylnicotinamide                   | Cofactors and Vitamins | 0.21  | 0.01  | 0.04  |
| palmitate (16:0)                       | Lipid                  | 0.12  | -0.01 | 0.07  |
| 2-hydroxybutyrate/2-hydroxyisobutyrate | Amino Acid             | 0.31  | 0.01  | -0.01 |
| azelate (C9-DC)                        | Lipid                  | 0.25  | 0.01  | 0.02  |
| dodecadienoate (12:2)*                 | Lipid                  | 0.19  | 0.01  | -0.03 |
| lanthionine                            | Amino Acid             | 0.22  | 0.01  | 0.01  |
| lactose                                | Carbohydrate           | 0.28  | -0.01 | -0.03 |
| nicotinamide                           | Cofactors and Vitamins | 0.07  | -0.01 | 0.02  |
| pantothenate (Vitamin B5)              | Cofactors and Vitamins | 0.58  | -0.01 | -0.11 |
| laurate (12:0)                         | Lipid                  | 0.13  | -0.01 | -0.02 |
| ectoine                                | Xenobiotics            | 0.06  | -0.01 | 0.01  |
| dodecenedioate (C12:1-DC)*             | Lipid                  | 0.21  | -0.01 | 0.01  |
| methionine                             | Amino Acid             | 0.11  | -0.01 | 0.03  |
| 3-(3-hydroxyphenyl)propionate          | Xenobiotics            | 0.25  | 0.00  | 0.02  |
| (N(1) + N(8))-acetylspermidine         | Amino Acid             | 0.39  | 0.00  | 0.02  |
| 2-hydroxydecanoate                     | Lipid                  | 0.20  | 0.00  | -0.06 |
| pregnenolone sulfate                   | Lipid                  | 0.50  | 0.00  | 0.06  |
| prolylhydroxyproline                   | Amino Acid             | 0.33  | 0.00  | 0.12  |
| tetradecadienoate (14:2)*              | Lipid                  | 0.12  | 0.00  | 0.04  |
| 4-acetamidobutanoate                   | Amino Acid             | 0.31  | 0.00  | 0.03  |
| N1-Methyl-2-pyridone-5-carboxamide     | Cofactors and Vitamins | 0.28  | 0.00  | -0.01 |
| cysteine-glutathione disulfide         | Amino Acid             | 0.10  | 0.00  | 0.08  |
| salicylate                             | Xenobiotics            | 0.00  | 0.00  | -0.01 |
| 1-linoleoyl-GPE (18:2)*                | Lipid                  | 0.11  | 0.00  | 0.02  |
| AMP                                    | Nucleotide             | 0.28  | 0.00  | 0.12  |
| 3-hydroxystachydrine*                  | Xenobiotics            | 0.27  | -0.21 | 0.18  |
| dimethylglycine                        | Amino Acid             | -0.60 | -0.11 | -0.06 |

\*: putative annotation.

**Table S3.** List of metabolites identified with associated biochemical classes.

| Super Pathway | Sub Pathway                               | Biochemical                            |
|---------------|-------------------------------------------|----------------------------------------|
| Amino Acid    | Alanine and Aspartate Metabolism          | asparagine                             |
|               |                                           | hydroxyasparagine                      |
|               |                                           | N,N-dimethylalanine                    |
|               | Creatine Metabolism                       | creatine                               |
|               |                                           | creatinine                             |
|               | Glutamate Metabolism                      | alpha-ketoglutamamate*                 |
|               |                                           | glutamate                              |
|               |                                           | glutamine                              |
|               |                                           | pyroglutamine*                         |
|               | Glutathione Metabolism                    | 2-hydroxybutyrate/2-hydroxyisobutyrate |
|               |                                           | cysteine-glutathione disulfide         |
|               | Glycine, Serine and Threonine Metabolism  | betaine                                |
|               |                                           | dimethylglycine                        |
|               |                                           | glycine                                |
|               |                                           | N-acetylserine                         |
|               |                                           | threonine                              |
|               | Guanidino and Acetamido Metabolism        | 4-guanidinobutanoate                   |
|               |                                           | 1-methylhistidine                      |
|               |                                           | 3-methylhistidine                      |
|               | Histidine Metabolism                      | histidine                              |
|               |                                           | N-acetyl-1-methylhistidine*            |
|               |                                           | N-acetylcarnosine                      |
|               |                                           | trans-uocanate                         |
|               |                                           | 1-carboxyethylvaline                   |
|               | Leucine, Isoleucine and Valine Metabolism | 2-ketocaprylate                        |
|               |                                           | 3-methyl-2-oxobutyrate                 |
|               |                                           | 3-methylcrotonylglycine                |
|               |                                           | 3-methylglutaconate                    |
|               |                                           | 3-methylglutaryl carnitine (2)         |
|               |                                           | alpha-hydroxyisocaproate               |
|               |                                           | beta-hydroxyisovaleroyl carnitine      |
|               |                                           | isovaleryl carnitine (C5)              |
|               |                                           | isovaleryl glycine                     |
|               |                                           | leucine                                |
|               |                                           | N-acetyl leucine                       |
|               |                                           | valine                                 |
|               | Lysine Metabolism                         | 2-aminoadipate                         |
|               |                                           | 5-hydroxylysine                        |
|               |                                           | 6-oxopiperidine-2-carboxylate          |
|               |                                           | hydroxy-N6,N6,N6-trimethyllysine*      |
|               |                                           | lysine                                 |
|               |                                           | N,N,N-trimethyl-5-aminovalerate        |
|               |                                           | N2-acetyl,N6-methyllysine              |
|               |                                           | N6,N6,N6-trimethyllysine               |
|               |                                           | N6,N6-dimethyllysine                   |

|                                                  |                                       |
|--------------------------------------------------|---------------------------------------|
|                                                  | N6-acetyllysine                       |
|                                                  | N6-methyllysine                       |
|                                                  | pipecolate                            |
| Methionine, Cysteine, SAM and Taurine Metabolism | 2-hydroxy-4-(methylthio)butanoic acid |
|                                                  | alpha-ketobutyrate                    |
|                                                  | cysteine                              |
|                                                  | lanthionine                           |
|                                                  | methionine                            |
|                                                  | methionine sulfone                    |
|                                                  | methionine sulfoxide                  |
|                                                  | N-acetylmethionine                    |
|                                                  | N-formylmethionine                    |
|                                                  | S-methylmethionine                    |
|                                                  | taurine                               |
| Phenylalanine Metabolism                         | 1-carboxyethylphenylalanine           |
|                                                  | 4-hydroxyphenylacetate                |
|                                                  | N-acetylphenylalanine                 |
|                                                  | phenylalanine                         |
|                                                  | phenyllactate (PLA)                   |
| Polyamine Metabolism                             | phenylpyruvate                        |
|                                                  | (N(1) + N(8))-acetylspermidine        |
|                                                  | 4-acetamidobutanoate                  |
|                                                  | 5-methylthioadenosine (MTA)           |
|                                                  | spermidine                            |
| Tryptophan Metabolism                            | spermine                              |
|                                                  | 3-hydroxykynurenine                   |
|                                                  | 6-bromotryptophan                     |
|                                                  | 8-methoxykynurenate                   |
|                                                  | indoleacetate                         |
|                                                  | indolelactate                         |
|                                                  | indolepropionate                      |
|                                                  | kynurenine                            |
|                                                  | N-acetyltryptophan                    |
|                                                  | N-formylanthranilic acid              |
|                                                  | tryptophan                            |
| Tyrosine Metabolism                              | tryptophan betaine                    |
|                                                  | 3-(4-hydroxyphenyl)lactate (HPLA)     |
|                                                  | 3-methoxytyrosine                     |
|                                                  | tyrosine                              |
| Urea cycle; Arginine and Proline Metabolism      | vanillactate                          |
|                                                  | 2-oxoarginine*                        |
|                                                  | 3-amino-2-piperidone                  |
|                                                  | arginine                              |
|                                                  | citrulline                            |
|                                                  | dimethylarginine (ADMA + SDMA)        |
|                                                  | homoarginine                          |
|                                                  | homocitrulline                        |



|                        |                                                              |                                              |
|------------------------|--------------------------------------------------------------|----------------------------------------------|
| Carbohydrate           | Advanced Glycation End-product                               | hydroxyproline                               |
|                        |                                                              | N,N,N-trimethyl-alanylproline betaine (TMAP) |
|                        |                                                              | N-acetylcitrulline                           |
|                        |                                                              | ornithine                                    |
|                        |                                                              | proline                                      |
|                        | Aminosugar Metabolism                                        | prolylhydroxyproline                         |
|                        |                                                              | N6-carboxymethyllysine                       |
|                        |                                                              | glucuronate                                  |
|                        |                                                              | N-acetylglucosamine/N-acetylgalactosamine    |
|                        |                                                              | lactose                                      |
| Cofactors and Vitamins | Disaccharides and Oligosaccharides                           | lactose                                      |
|                        | Glycolysis, Gluconeogenesis, and Pyruvate Metabolism         | 3-phosphoglycerate                           |
|                        | Pentose Metabolism                                           | arabitol/xylitol                             |
|                        | Hemoglobin and Porphyrin Metabolism                          | biliverdin                                   |
|                        | Nicotinate and Nicotinamide Metabolism                       | 1-methylnicotinamide                         |
|                        |                                                              | N1-Methyl-2-pyridone-5-carboxamide           |
|                        |                                                              | N1-Methyl-4-pyridone-3-carboxamide           |
|                        |                                                              | nicotinamide                                 |
|                        |                                                              | trigonelline (N'-methylnicotinate)           |
|                        | Pantothenate and CoA Metabolism                              | pantothenate (Vitamin B5)                    |
| Energy                 | Vitamin B6 Metabolism                                        | pyridoxate                                   |
|                        | TCA Cycle                                                    | aconitate [cis or trans]                     |
|                        |                                                              | alpha-ketoglutarate                          |
|                        |                                                              | citraconate/glutaconate                      |
|                        |                                                              | citrate                                      |
|                        |                                                              | succinylcarnitine (C4-DC)                    |
|                        |                                                              |                                              |
| Lipid                  | Carnitine Metabolism                                         | carnitine                                    |
|                        | Corticosteroids                                              | cortisol                                     |
|                        | Corticosteroids                                              | cortisone                                    |
|                        | Eicosanoid                                                   | 12-HETE                                      |
|                        | Endocannabinoid                                              | N-oleoylserine                               |
|                        |                                                              | N-palmitoylserine                            |
|                        |                                                              | palmitoyl ethanolamide                       |
|                        | Fatty Acid Metabolism (Acyl Carnitine, Dicarboxylate)        | octadecanedioylcarnitine (C18-DC)*           |
|                        |                                                              | octadecenedioylcarnitine (C18:1-DC)*         |
|                        |                                                              | suberoylcarnitine (C8-DC)                    |
|                        | Fatty Acid Metabolism (Acyl Carnitine, Hydroxy)              | (R)-3-hydroxybutyrylcarnitine                |
|                        |                                                              | 3-hydroxyhexanoylcarnitine (1)               |
|                        | Fatty Acid Metabolism (Acyl Carnitine, Long Chain Saturated) | palmitoylcarnitine (C16)                     |
|                        | Fatty Acid Metabolism (Acyl Carnitine, Medium Chain)         | hexanoylcarnitine (C6)                       |
|                        | Fatty Acid Metabolism (Acyl Carnitine, Monounsaturated)      | cis-4-decenoylcarnitine (C10:1)              |
|                        |                                                              | myristoleoylcarnitine (C14:1)*               |
|                        |                                                              | oleoylcarnitine (C18)                        |
|                        |                                                              | palmitoleoylcarnitine (C16:1)*               |

|                                                         |                                                      |
|---------------------------------------------------------|------------------------------------------------------|
|                                                         | undecenoylcarnitine (C11:1)                          |
| Fatty Acid Metabolism (Acyl Carnitine. Polyunsaturated) | arachidonoylcarnitine (C20:4)                        |
|                                                         | linoleoylcarnitine (C18:2)*                          |
| Fatty Acid Metabolism (Acyl Carnitine. Short Chain)     | acetylcarnitine (C2)                                 |
| Fatty Acid Metabolism (Acyl Glutamine)                  | hexanoylglutamine                                    |
|                                                         | 3-hydroxybutyrylglycine                              |
| Fatty Acid Metabolism (Acyl Glycine)                    | N-palmitoylglycine                                   |
|                                                         | picolinoylglycine                                    |
| Fatty Acid Metabolism (also BCAA Metabolism)            | butyrylcarnitine (C4)                                |
|                                                         | propionylcarnitine (C3)                              |
|                                                         | propionylglycine (C3)                                |
| Fatty Acid. Amide                                       | palmitamide (16:0)                                   |
| Fatty Acid. Amino                                       | 2-aminoheptanoate                                    |
|                                                         | 2-aminooctanoate                                     |
|                                                         | N-acetyl-2-aminooctanoate*                           |
| Fatty Acid. Branched                                    | (14 or 15)-methylpalmitate (a17:0 or i17:0)          |
| Fatty Acid. Dicarboxylate                               | 3-carboxy-4-methyl-5-propyl-2-furanpropanoate (CMPF) |
|                                                         | 4-hydroxy-2-oxoglutaric acid                         |
|                                                         | azelate (C9-DC)                                      |
|                                                         | dodecadienoate (12:2)*                               |
|                                                         | dodecanedioate (C12)                                 |
|                                                         | dodecenedioate (C12:1-DC)*                           |
|                                                         | glutarate (C5-DC)                                    |
|                                                         | heptenedioate (C7:1-DC)*                             |
|                                                         | tridecenedioate (C13:1-DC)*                          |
| Fatty Acid. Dihydroxy                                   | 2R,3R-dihydroxybutyrate                              |
| Fatty Acid. Monohydroxy                                 | 13-HODE + 9-HODE                                     |
|                                                         | 16-hydroxypalmitate                                  |
|                                                         | 2-hydroxydecanoate                                   |
|                                                         | 2-hydroxylaurate                                     |
|                                                         | 2-hydroxypalmitate                                   |
|                                                         | 3-hydroxydecanoate                                   |
|                                                         | 3-hydroxyhexanoate                                   |
| Glycerolipid Metabolism                                 | glycerol 3-phosphate                                 |
| Long Chain Polyunsaturated Fatty Acid (n3 and n6)       | arachidonate (20:4n6)                                |
|                                                         | docosahexaenoate (DHA; 22:6n3)                       |
|                                                         | eicosapentaenoate (EPA; 20:5n3)                      |
|                                                         | linoleate (18:2n6)                                   |
|                                                         | linolenate (18:3n3 or 3n6)                           |
|                                                         | nisinate (24:6n3)                                    |
|                                                         | tetradecadienoate (14:2)*                            |
| Long Chain Saturated Fatty Acid                         | palmitate (16:0)                                     |
| Lysophospholipid                                        | 1-linoleoyl-GPE (18:2)*                              |
| Medium Chain Fatty Acid                                 | (2 or 3)-decenoate (10:1n7 or n8)                    |
|                                                         | caprate (10:0)                                       |

|             |                                                      |                                      |
|-------------|------------------------------------------------------|--------------------------------------|
|             |                                                      | caproate (6:0)                       |
|             |                                                      | laurate (12:0)                       |
|             | Monoacylglycerol                                     | 1-myristoylglycerol (14:0)           |
|             | Phospholipid Metabolism                              | choline                              |
|             |                                                      | glycerophosphoethanolamine           |
|             |                                                      | phosphocholine                       |
|             |                                                      | phosphoethanolamine (PE)             |
|             | Pregnenolone Steroids                                | 21-hydroxypregnenolone disulfate     |
|             |                                                      | pregnenolone sulfate                 |
|             | Secondary Bile Acid Metabolism                       | deoxycholic acid (12 or 24)-sulfate* |
|             |                                                      | glycoursodeoxycholate                |
|             | Sphingolipid Synthesis                               | sphinganine                          |
|             | Sphingosines                                         | sphingosine                          |
|             | Sterol                                               | 3beta-hydroxy-5-cholestenoate        |
|             |                                                      | 7-HOCA                               |
| Nucleotide  | Purine Metabolism. (Hypo)Xanthine/Inosine containing | allantoin                            |
|             |                                                      | inosine 5'-monophosphate (IMP)       |
|             | Purine Metabolism. Adenine containing                | 1-methyladenosine                    |
|             |                                                      | AMP                                  |
|             | Purine Metabolism. Guanine containing                | 7-methylguanine                      |
|             |                                                      | guanosine                            |
|             |                                                      | N2,N2-dimethylguanosine              |
|             | Pyrimidine Metabolism. Cytidine containing           | 3-methylcytidine                     |
|             |                                                      | cytosine                             |
|             | Pyrimidine Metabolism. Orotate containing            | dihydroorotate                       |
| Peptide     | Dipeptide                                            | 5,6-dihydrothymine                   |
|             |                                                      | 5,6-dihydrouridine                   |
|             |                                                      | uracil                               |
|             | Gamma-glutamyl Amino Acid                            | phenylalanylhydroxyproline*          |
|             |                                                      | prolylglycine                        |
|             |                                                      | valylleucine                         |
|             |                                                      | gamma-glutamyl-2-aminobutyrate       |
|             |                                                      | gamma-glutamylalanine                |
|             |                                                      | gamma-glutamylglutamate              |
|             |                                                      | gamma-glutamylglutamine              |
|             |                                                      | gamma-glutamylglycine                |
|             |                                                      | gamma-glutamylhistidine              |
|             |                                                      | gamma-glutamylphenylalanine          |
|             |                                                      | gamma-glutamylthreonine              |
|             |                                                      | gamma-glutamyltyrosine               |
|             |                                                      | gamma-glutamylvaline                 |
| Xenobiotics | Benzoate Metabolism                                  | 3-(3-hydroxyphenyl)propionate        |
|             |                                                      | 3-hydroxyhippurate                   |
|             |                                                      | 3-methoxycatechol sulfate (2)        |
|             |                                                      | 3-phenylpropionate (hydrocinnamate)  |
|             |                                                      | 4-hydroxyhippurate                   |
|             | Chemical                                             | 1,2,3-benzenetriol sulfate (2)       |

|                                   |                                                                           |
|-----------------------------------|---------------------------------------------------------------------------|
|                                   | 6-hydroxyindole sulfate                                                   |
|                                   | ectoine                                                                   |
|                                   | iminodiacetate (IDA)                                                      |
|                                   | O-sulfo-L-tyrosine                                                        |
|                                   | thioprolin                                                                |
| Drug - Analgesics. Anesthetics    | 2-hydroxyacetaminophen sulfate*                                           |
|                                   | 2-hydroxyibuprofen                                                        |
|                                   | 3-(N-acetyl-L-cystein-S-yl)<br>acetaminophen                              |
|                                   | lidocaine                                                                 |
| Drug - Antibiotic                 | metronidazole                                                             |
| Drug - Cardiovascular             | metoprolol acid metabolite*                                               |
| Drug - Psychoactive               | citalopram propionate*                                                    |
| Drug - Topical Agents             | salicylate                                                                |
| Food Component/Plant              | 2-piperidinone                                                            |
|                                   | 3,4-methyleneheptanoate                                                   |
|                                   | 3-formylindole                                                            |
|                                   | 3-hydroxystachydrine*                                                     |
|                                   | 3-indoleglyoxylic acid                                                    |
|                                   | cinnamoylglycine                                                          |
|                                   | dihydroferulate                                                           |
|                                   | ergothioneine                                                             |
|                                   | erythritol                                                                |
|                                   | gluconate                                                                 |
|                                   | homostachydrine*                                                          |
|                                   | indolin-2-one                                                             |
|                                   | methyl glucopyranoside (alpha + beta)                                     |
|                                   | methyl indole-3-acetate                                                   |
|                                   | N-(2-furoyl)glycine                                                       |
|                                   | N-acetyltheanine                                                          |
|                                   | quinate                                                                   |
|                                   | S-allylcysteine                                                           |
|                                   | stachydrine                                                               |
|                                   | tartarate                                                                 |
|                                   | theanine                                                                  |
|                                   | thymol sulfate                                                            |
|                                   | vanillic acid glycine                                                     |
| Tobacco Metabolite                | cotinine                                                                  |
|                                   | hydroxycotinine                                                           |
| Xanthine Metabolism               | 1,3,7-trimethylurate                                                      |
|                                   | caffeine                                                                  |
|                                   | paraxanthine                                                              |
|                                   | theobromine                                                               |
| Partially Characterized Molecules | glutamine conjugate of C <sub>6</sub> H <sub>10</sub> O <sub>2</sub> (1)* |
|                                   | glutamine conjugate of C <sub>6</sub> H <sub>10</sub> O <sub>2</sub> (2)* |
|                                   | glycine conjugate of C <sub>10</sub> H <sub>14</sub> O <sub>2</sub> (1)*  |

\*: putative annotation.

**Table S4.** PLS-R model of metabolites reported. Pathway indicates which metabolites from the mothers were used in the model. w24=plasma from mothers at 24 weeks of pregnancy (N=664). w1=plasma from mothers 1 week postpartum (N=661). LV=number of latent variables included in the model.

| Biochemical                                   | Pathway                   | Mothers | LV | R <sup>2</sup><br>Cal | R <sup>2</sup><br>CV | RMSE<br>Cal           | RMSE<br>CV            |
|-----------------------------------------------|---------------------------|---------|----|-----------------------|----------------------|-----------------------|-----------------------|
| 3-carboxy-4-methyl-5-propyl-2-furanpropanoate | all                       | w24     | 2  | 0.31                  | 0.00                 | 5.22X10 <sup>-4</sup> | 7.75X10 <sup>-3</sup> |
|                                               | Lipids                    | w24     | 2  | 0.23                  | 0.10                 | 5.50X10 <sup>-4</sup> | 6.00X10 <sup>-4</sup> |
|                                               | Fatty Acid. Dicarboxylate | w24     | 2  | 0.25                  | 0.20                 | 5.40X10 <sup>-4</sup> | 5.60X10 <sup>-4</sup> |
|                                               | all                       | w1      | 2  | 0.60                  | 0.49                 | 3.90X10 <sup>-4</sup> | 4.40X10 <sup>-4</sup> |
|                                               | Lipids                    | w1      | 2  | 0.59                  | 0.53                 | 3.90X10 <sup>-4</sup> | 4.20X10 <sup>-4</sup> |
|                                               | Fatty Acid. Dicarboxylate | w1      | 4  | 0.76                  | 0.74                 | 3.00X10 <sup>-4</sup> | 3.20X10 <sup>-4</sup> |
| tryptophan betaine                            | all                       | w24     | 4  | 0.62                  | 0.18                 | 4.60X10 <sup>-4</sup> | 7.12X10 <sup>-4</sup> |
|                                               | Amino Acids               | w24     | 4  | 0.56                  | 0.35                 | 4.92X10 <sup>-4</sup> | 6.06X10 <sup>-4</sup> |
|                                               | Tryptophan Metabolism     | w24     | 4  | 0.47                  | 0.43                 | 5.42X10 <sup>-4</sup> | 5.63X10 <sup>-4</sup> |
|                                               | all                       | w1      | 2  | 0.41                  | 0.12                 | 6.18X10 <sup>-4</sup> | 7.82X10 <sup>-4</sup> |
|                                               | Amino Acids               | w1      | 2  | 0.60                  | 0.44                 | 5.08X10 <sup>-4</sup> | 6.05X10 <sup>-4</sup> |
|                                               | Tryptophan Metabolism     | w1      | 2  | 0.70                  | 0.68                 | 4.05X10 <sup>-4</sup> | 4.18X10 <sup>-4</sup> |
| ergothioneine                                 | all                       | w24     | 11 | 0.89                  | 0.20                 | 4.60X10 <sup>-5</sup> | 1.37X10 <sup>-4</sup> |
|                                               | Xenobiotics               | w24     | 3  | 0.51                  | 0.31                 | 9.60X10 <sup>-5</sup> | 1.16X10 <sup>-4</sup> |
|                                               | Food component/<br>plant  | w24     | 3  | 0.53                  | 0.45                 | 9.40X10 <sup>-5</sup> | 1.02X10 <sup>-4</sup> |
|                                               | all                       | w1      | 2  | 0.37                  | 0.12                 | 1.09X10 <sup>-4</sup> | 1.36X10 <sup>-4</sup> |
|                                               | Xenobiotics               | w1      | 3  | 0.49                  | 0.20                 | 9.78X10 <sup>-5</sup> | 1.40X10 <sup>-4</sup> |
|                                               | Food component/<br>plant  | w1      | 3  | 0.51                  | 0.43                 | 9.60X10 <sup>-5</sup> | 1.04X10 <sup>-4</sup> |
| N6-methyllysine                               | all                       | w24     | 3  | 0.59                  | 0.09                 | 1.85X10 <sup>-5</sup> | 3.63X10 <sup>-5</sup> |
|                                               | Amino Acids               | w24     | 3  | 0.45                  | 0.29                 | 2.14X10 <sup>-5</sup> | 2.43X10 <sup>-5</sup> |
|                                               | Lysin Metabolism          | w24     | 4  | 0.38                  | 0.35                 | 2.26X10 <sup>-5</sup> | 2.31X10 <sup>-5</sup> |
|                                               | all                       | w1      | 2  | 0.42                  | 0.15                 | 2.22X10 <sup>-5</sup> | 2.74X10 <sup>-5</sup> |
|                                               | Amino Acids               | w1      | 2  | 0.38                  | 0.27                 | 2.50X10 <sup>-5</sup> | 2.49X10 <sup>-5</sup> |
|                                               | Lysin Metabolism          | w1      | 2  | 0.37                  | 0.35                 | 2.30X10 <sup>-5</sup> | 2.35X10 <sup>-5</sup> |
| N,N,N-trimethyl-5-aminovalerate               | all                       | w24     | 2  | 0.19                  | 0.05                 | 1.20X10 <sup>-3</sup> | 1.30X10 <sup>-3</sup> |
|                                               | Amino Acids               | w24     | 2  | 0.29                  | 0.13                 | 1.10X10 <sup>-3</sup> | 1.20X10 <sup>-3</sup> |
|                                               | Lysin Metabolism          | w24     | 2  | 0.31                  | 0.28                 | 1.10X10 <sup>-3</sup> | 1.10X10 <sup>-3</sup> |
|                                               | all                       | w1      | 2  | 0.35                  | 0.07                 | 1.10X10 <sup>-3</sup> | 1.40X10 <sup>-3</sup> |
|                                               | Amino Acids               | w1      | 3  | 0.43                  | 0.20                 | 9.90X10 <sup>-4</sup> | 1.20X10 <sup>-3</sup> |
|                                               | Lysin Metabolism          | w1      | 3  | 0.32                  | 0.29                 | 1.10X10 <sup>-3</sup> | 1.20X10 <sup>-3</sup> |
| stachydrine                                   | all                       | w24     | 2  | 0.33                  | 0.12                 | 4.35X10 <sup>-3</sup> | 5.15X10 <sup>-3</sup> |

|                         |                                                      |     |   |      |      |                       |                       |
|-------------------------|------------------------------------------------------|-----|---|------|------|-----------------------|-----------------------|
|                         | Xenobiotics                                          | w24 | 2 | 0.26 | 0.14 | 4.58X10 <sup>-3</sup> | 5.00X10 <sup>-3</sup> |
|                         | Food component/<br>plant                             | w24 | 2 | 0.21 | 0.14 | 4.73X10 <sup>-3</sup> | 4.98X10 <sup>-3</sup> |
|                         | all                                                  | w1  | 3 | 0.51 | 0.23 | 3.73X10 <sup>-3</sup> | 4.82X10 <sup>-3</sup> |
|                         | Xenobiotics                                          | w1  | 2 | 0.34 | 0.20 | 4.33X10 <sup>-3</sup> | 4.83X10 <sup>-3</sup> |
|                         | Food component/<br>plant                             | w1  | 2 | 0.30 | 0.25 | 4.45X10 <sup>-3</sup> | 4.62X10 <sup>-3</sup> |
|                         | all                                                  | w24 | 1 | 0.19 | 0.06 | 3.00X10 <sup>-5</sup> | 3.00X10 <sup>-5</sup> |
| <b>homostachydrine*</b> | Xenobiotics                                          | w24 | 2 | 0.23 | 0.05 | 3.00X10 <sup>-5</sup> | 3.70X10 <sup>-5</sup> |
|                         | Food component/<br>plant                             | w24 | 2 | 0.16 | 0.07 | 3.20X10 <sup>-5</sup> | 3.40X10 <sup>-5</sup> |
|                         | all                                                  | w1  | 1 | 0.20 | 0.04 | 3.10X10 <sup>-5</sup> | 3.50X10 <sup>-5</sup> |
|                         | Xenobiotics                                          | w1  | 1 | 0.11 | 0.03 | 3.20X10 <sup>-5</sup> | 3.60X10 <sup>-5</sup> |
|                         | Food component/<br>plant                             | w1  | 2 | 0.27 | 0.12 | 3.00X10 <sup>-5</sup> | 3.30X10 <sup>-5</sup> |
|                         | all                                                  | w24 | 1 | 0.18 | 0.03 | 2.26X10 <sup>-5</sup> | 2.53X10 <sup>-5</sup> |
| <b>homoarginine</b>     | Amino Acids                                          | w24 | 2 | 0.36 | 0.17 | 2.00X10 <sup>-5</sup> | 2.31X10 <sup>-5</sup> |
|                         | Urea cycle;<br>Arginine and<br>Proline<br>Metabolism | w24 | 3 | 0.29 | 0.25 | 2.11X10 <sup>-5</sup> | 2.16X10 <sup>-5</sup> |
|                         | all                                                  | w1  | 2 | 0.32 | 0.02 | 2.06X10 <sup>-5</sup> | 3.13X10 <sup>-5</sup> |
|                         | Amino Acids                                          | w1  | 2 | 0.27 | 0.11 | 2.12X10 <sup>-5</sup> | 2.37X10 <sup>-5</sup> |
|                         | Urea cycle;<br>Arginine and<br>Proline<br>Metabolism | w1  | 3 | 0.21 | 0.16 | 2.21X10 <sup>-5</sup> | 2.28X10 <sup>-5</sup> |
|                         | all                                                  | w24 | 2 | 0.38 | 0.00 | 1.50X10 <sup>-4</sup> | 3.70X10 <sup>-3</sup> |
| <b>paraxanthine</b>     | Xenobiotics                                          | w24 | 2 | 0.31 | 0.00 | 1.60X10 <sup>-4</sup> | 1.10X10 <sup>-2</sup> |
|                         | Xanthine<br>Metabolism                               | w24 | 2 | 0.23 | 0.21 | 1.70X10 <sup>-4</sup> | 1.70X10 <sup>-4</sup> |
|                         | all                                                  | w1  | 2 | 0.34 | 0.06 | 1.50X10 <sup>-4</sup> | 2.00X10 <sup>-4</sup> |
|                         | Xenobiotics                                          | w1  | 2 | 0.29 | 0.01 | 1.60X10 <sup>-4</sup> | 3.70X10 <sup>-4</sup> |
|                         | Xanthine<br>Metabolism                               | w1  | 2 | 0.21 | 0.16 | 1.70X10 <sup>-4</sup> | 1.80X10 <sup>-4</sup> |
|                         | all                                                  | w24 | 2 | 0.38 | 0.00 | 2.36X10 <sup>-5</sup> | 3.70X10 <sup>-3</sup> |
| <b>cotinine</b>         | Xenobiotics                                          | w24 | 2 | 0.45 | 0.01 | 2.21X10 <sup>-5</sup> | 1.00X10 <sup>-3</sup> |
|                         | all                                                  | w1  | 2 | 0.32 | 0.06 | 2.40X10 <sup>-5</sup> | 2.97X10 <sup>-5</sup> |
|                         | Xenobiotics                                          | w1  | 2 | 0.22 | 0.04 | 2.57X10 <sup>-5</sup> | 3.42X10 <sup>-5</sup> |
|                         | all                                                  | w24 | 1 | 0.27 | 0.09 | 8.54X10 <sup>-1</sup> | 9.70X10 <sup>-1</sup> |
| <b>caffeine</b>         | Xenobiotics                                          | w24 | 1 | 0.19 | 0.07 | 9.00X10 <sup>-1</sup> | 1                     |
|                         | Xanthine<br>Metabolism                               | w24 | 1 | 0.21 | 0.20 | 8.80X10 <sup>-1</sup> | 8.90X10 <sup>-1</sup> |
|                         | all                                                  | w1  | 1 | 0.24 | 0.07 | 8.70X10 <sup>-1</sup> | 9.80X10 <sup>-1</sup> |
|                         | Xenobiotics                                          | w1  | 1 | 0.15 | 0.07 | 9.10X10 <sup>-1</sup> | 9.70X10 <sup>-1</sup> |
|                         | Xanthine<br>Metabolism                               | w1  | 1 | 0.01 | 0.00 | 9.90X10 <sup>-1</sup> | 1                     |
|                         | all                                                  | w24 | 1 | 0.19 | 0.07 | 9.00X10 <sup>-1</sup> | 1                     |

\*: putative annotation.

**Table S5.** Bootstrapped replication results for top 11 metabolites exhibiting vertical transfer.  $R_{m1-c}$  refers to the observed Pearson correlations, with bootstrapped 95% confidence bounds. # Discovery shows the discovery rate at the level of  $R_{m1-c} > 0.3$ , # replication shows the rate of the out of bag replication results at level  $R_{m1-c} > 0.3$  as well as plain significance  $p < 0.05$ . From a total of 1000 bootstraps.

| BIOCHEMICAL                     | $R_{m1-c}$       | # Discovery | # replication ( $r > 0.3$ ) | # replication ( $p < 0.05$ ) |
|---------------------------------|------------------|-------------|-----------------------------|------------------------------|
| CMPF                            | 0.87 (0.84-0.89) | 1000 (100%) | 1000 (100%)                 | 1000 (100%)                  |
| tryptophan betaine              | 0.82 (0.71-0.86) | 1000 (100%) | 1000 (100%)                 | 1000 (100%)                  |
| ergothioneine                   | 0.68 (0.61-0.74) | 1000 (100%) | 1000 (100%)                 | 1000 (100%)                  |
| N6-methyllysine                 | 0.6 (0.54-0.65)  | 1000 (100%) | 1000 (100%)                 | 1000 (100%)                  |
| N,N,N-trimethyl-5-aminovalerate | 0.54 (0.48-0.6)  | 1000 (100%) | 1000 (100%)                 | 1000 (100%)                  |
| stachydrine                     | 0.5 (0.43-0.56)  | 1000 (100%) | 1000 (100%)                 | 1000 (100%)                  |
| homostachydrine*                | 0.43 (0.31-0.54) | 988 (99%)   | 941 (95%)                   | 987 (100%)                   |
| homoarginine                    | 0.42 (0.34-0.49) | 997 (100%)  | 985 (99%)                   | 997 (100%)                   |
| paraxanthine                    | 0.4 (0.32-0.47)  | 995 (100%)  | 974 (98%)                   | 995 (100%)                   |
| cotinine                        | 0.36 (0.26-0.66) | 943 (94%)   | 771 (82%)                   | 932 (99%)                    |
| caffeine                        | 0.35 (0.26-0.44) | 867 (87%)   | 677 (78%)                   | 867 (100%)                   |

\*: putative annotation.

**Figure S1.** Robustness analysis for the transfer results given the fish oil intervention.

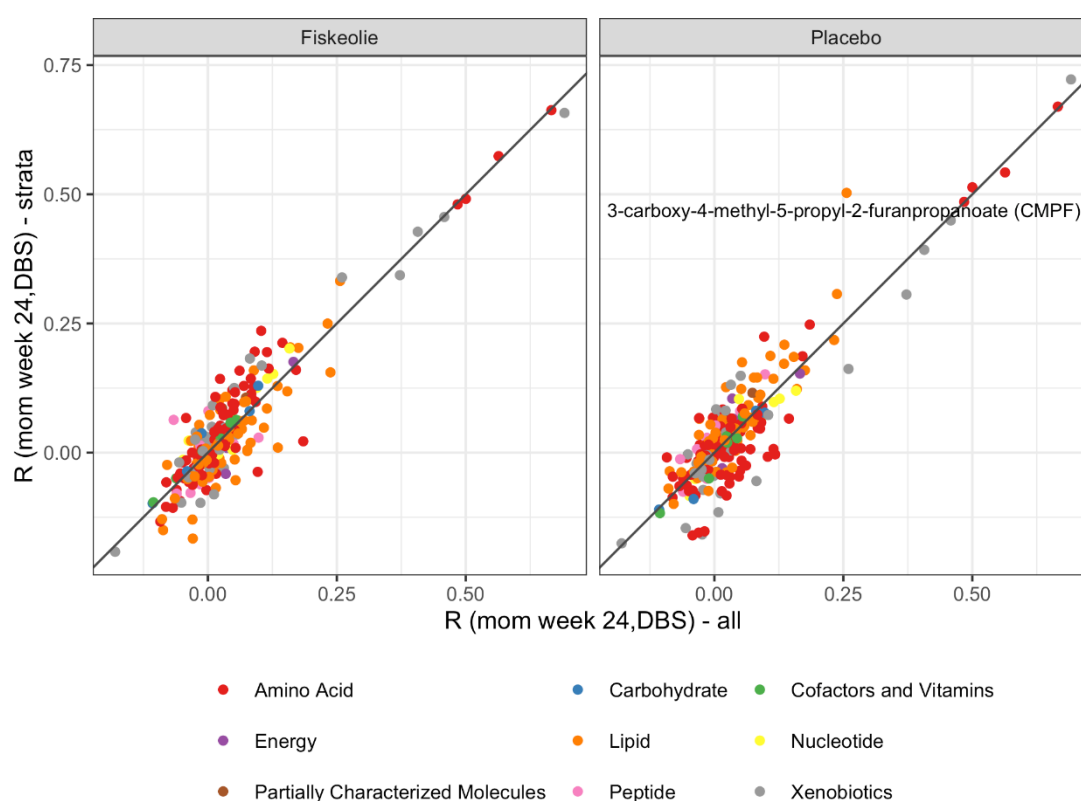

**Figure S2.** Child metabolite level from DBS as function of maternal week 24 mid pregnancy (red) and one week postpartum (blue) blood levels of the 11 metabolites with strong transfer merits ( $R_{m1-c} > 0.3$ ). The correlations denoted  $R$  and  $\rho$  refers to Pearson and Spearman correlation coefficients respectively.

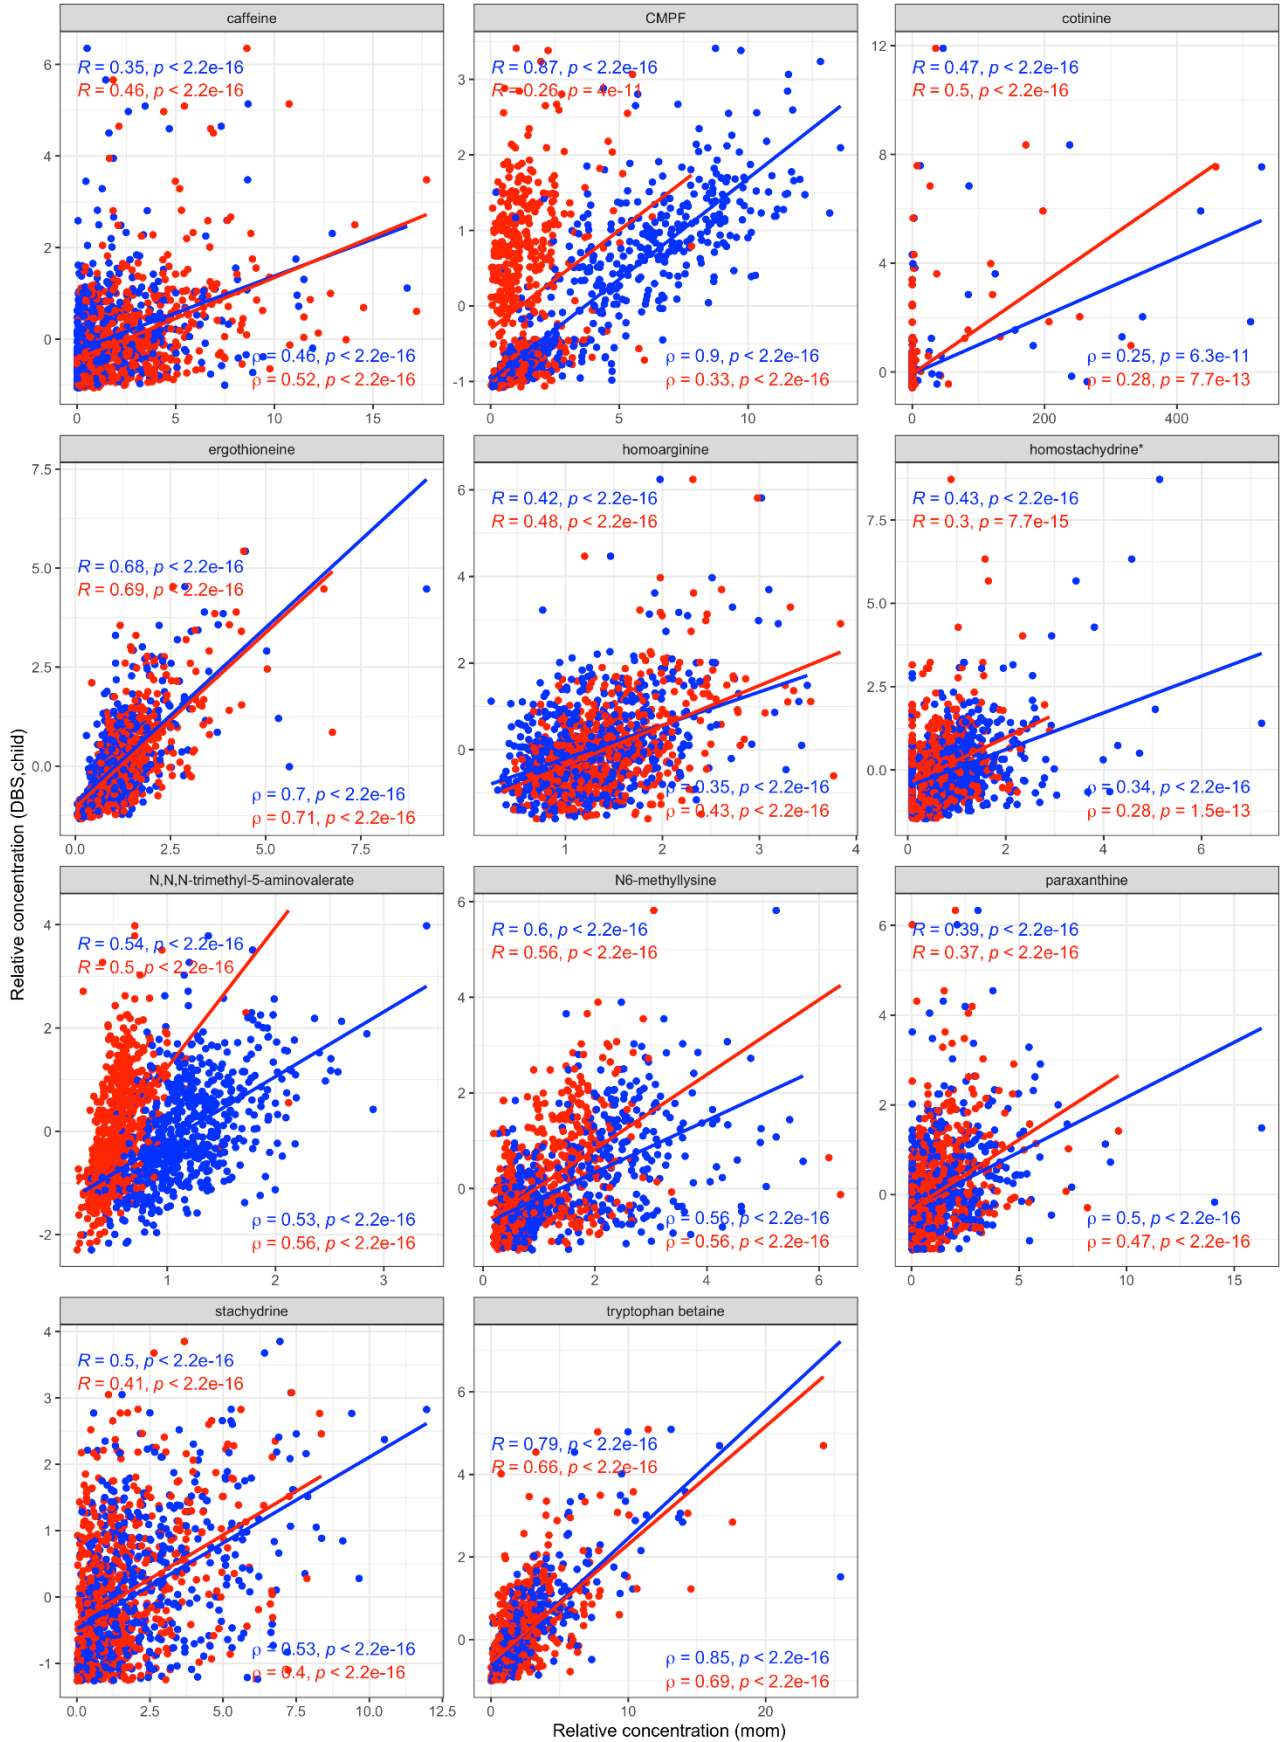



**Figure S3.** Maternal levels of one week postpartum samples versus week 24 mid pregnancy samples of the 11 metabolites with strong transfer merits ( $R_{m1-c} > 0.3$ ). The correlations denoted  $R$  and  $\rho$  refers to Pearson and Spearman correlation coefficients respectively.

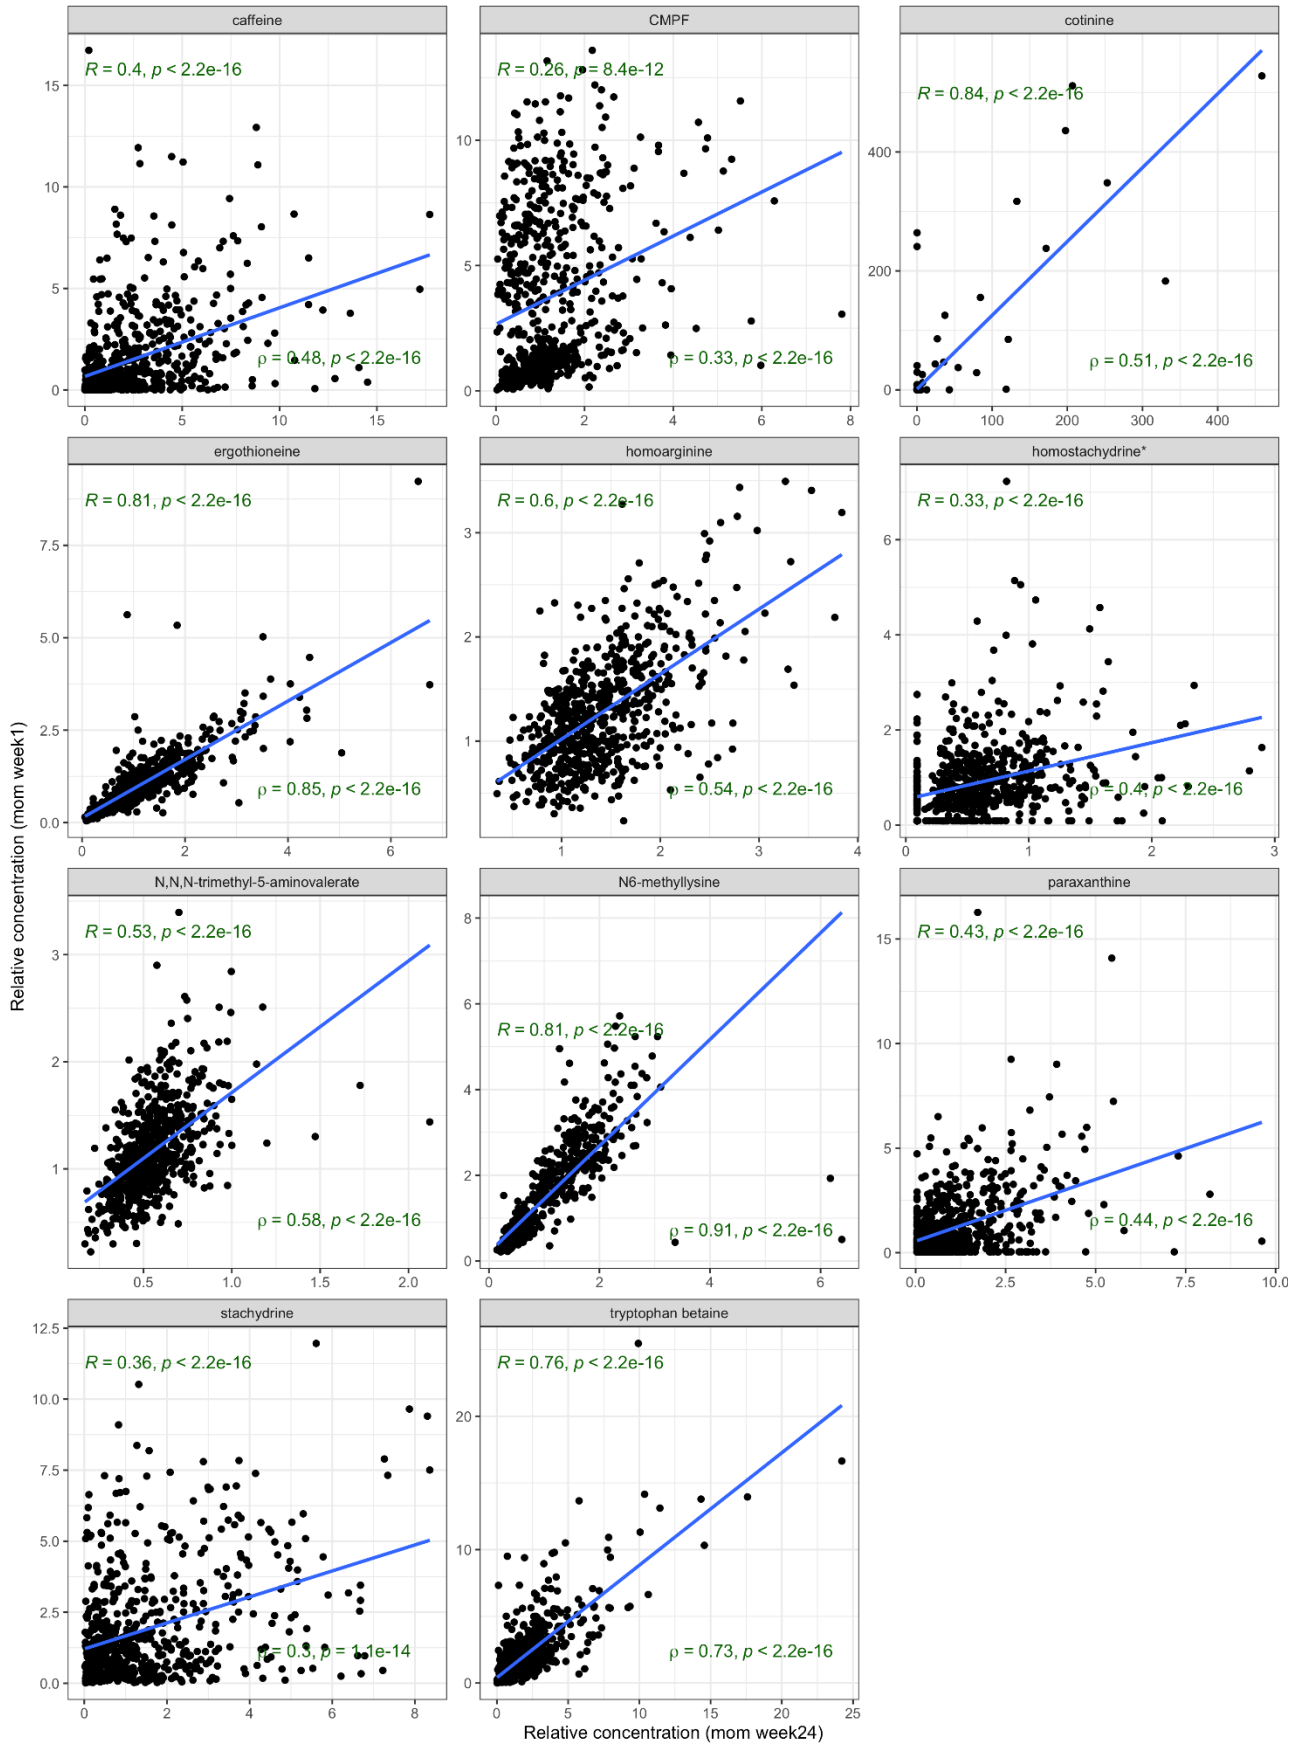

**Figure S4.** PCA loading plot of plasma from mothers at 24 weeks of pregnancy. Loadings were color-coded by correlation  $R_{m1-c}$ .

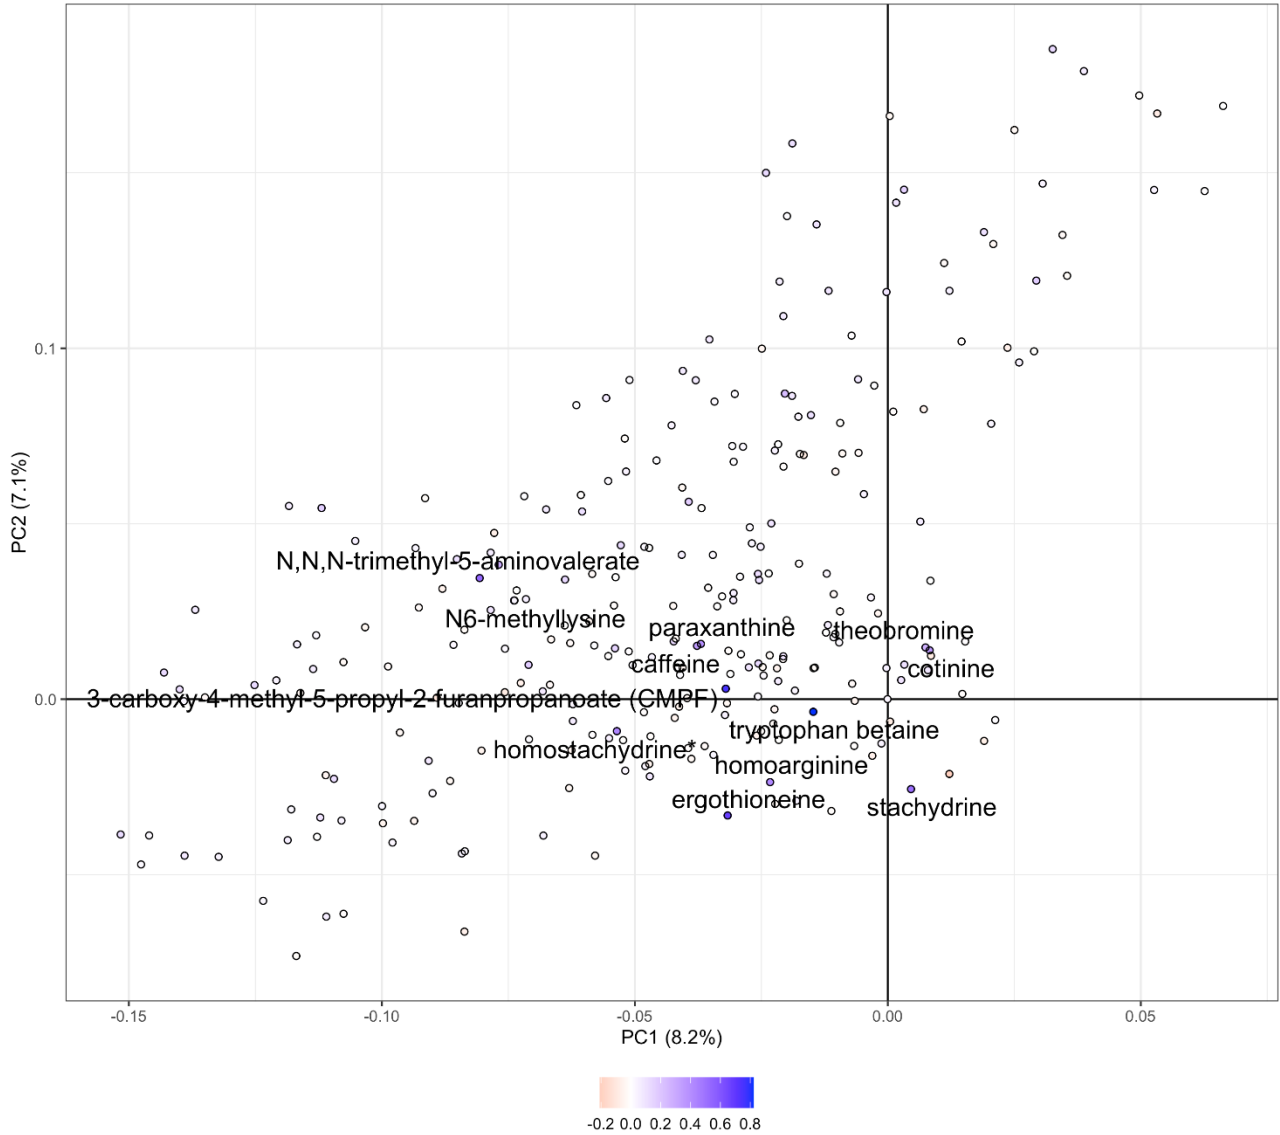

**Figure S5.** PCA loading plot of plasma from mothers 1 week postpartum. Loadings were color-coded by correlation  $R_{m1-c}$ .

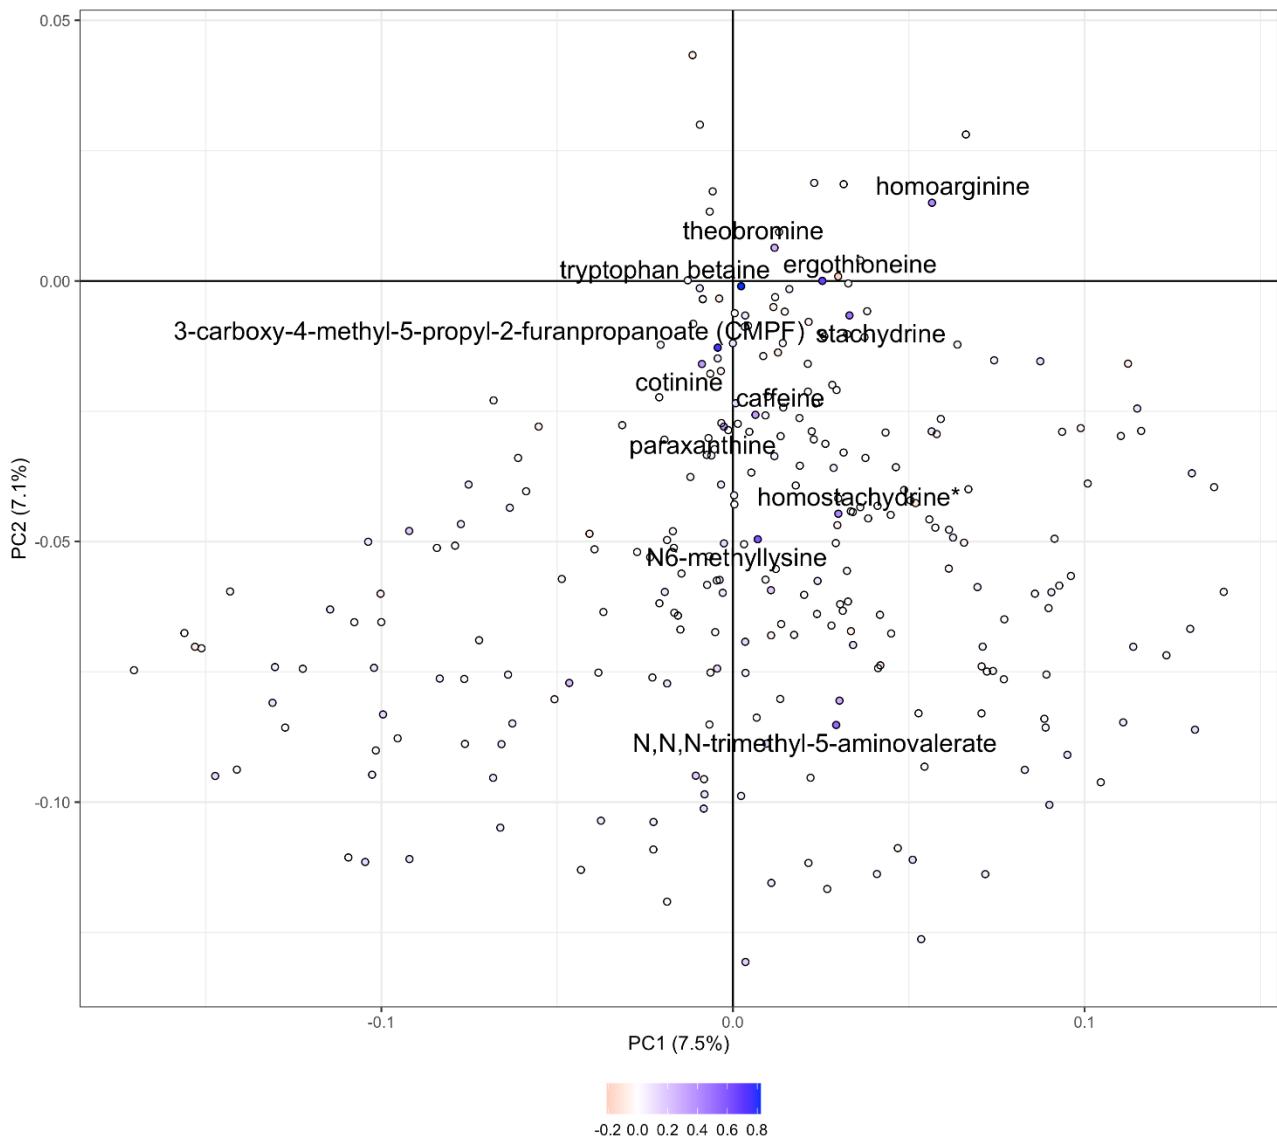

**Figure S6.** PCA loading plot of DBS samples from newborns. Loadings were color-coded by correlation  $R_{m1-c}$ .

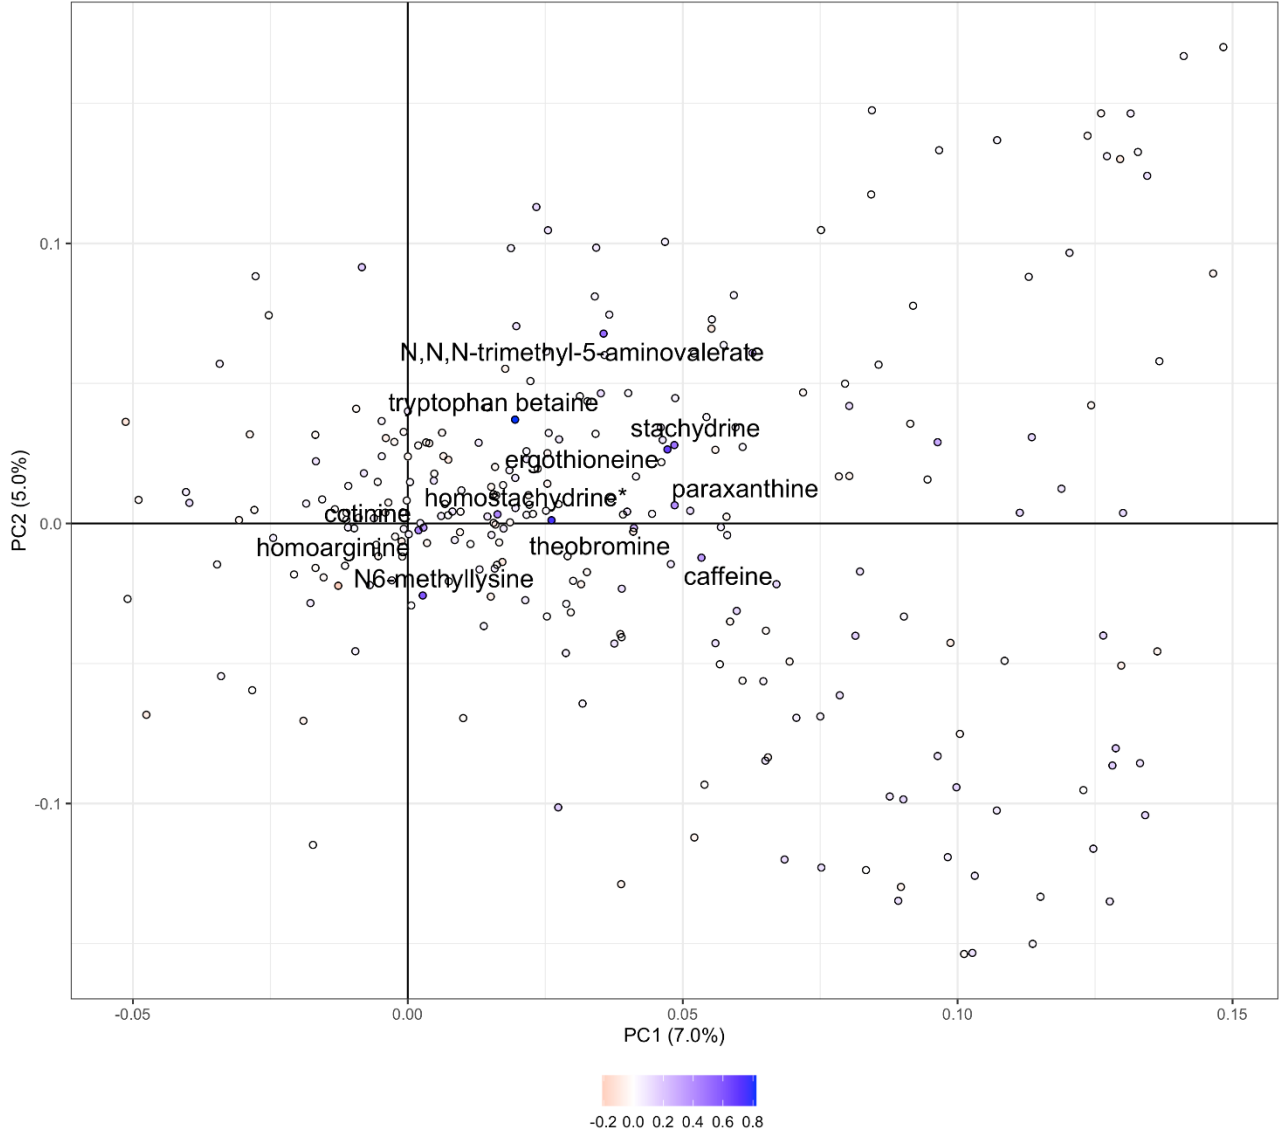

In addition to the PCA analysis the correlation between the metabolites with transfer statistics  $R_{m1-c} > 0.3$  (denoted within in Figure S7) is compared with the correlations between metabolites with  $R_{m1-c} > 0.3$  and metabolites with  $R_{m1-c} \leq 0.3$  (denoted between in Figure S7). This analysis is in agreement with the interpretation of the loadings plot, namely that there is not a particular pattern characterizing the metabolites exhibiting strong transfer statistics.

**Figure S7.** Metabolite to metabolite correlation computed within each time point and partitioned into within transferred metabolites ( $R_{m1-c} > 0.3$ ) and between none-to weak transferred ( $R_{m1-c} \leq 0.3$ ) and transferred ( $R_{m1-c} > 0.3$ ) metabolites.

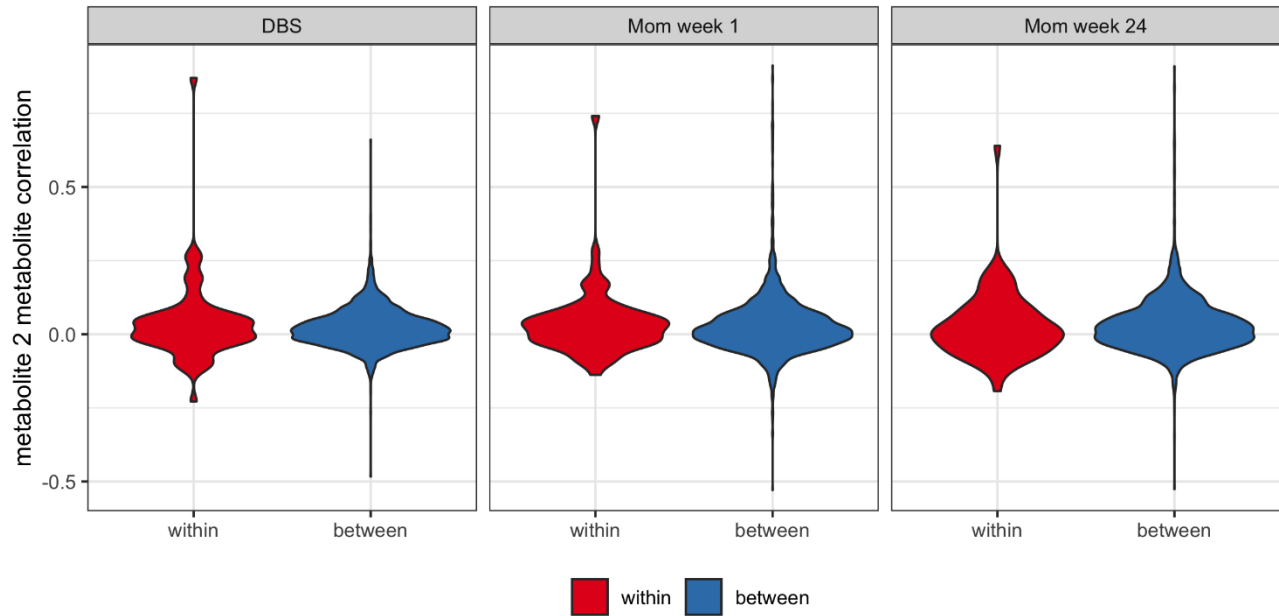

**Table S6.** Descriptive (median and IQR) for metabolite to metabolite correlations within each time point, and partitioned into within transferred metabolites ( $R_{m1-c} > 0.3$ ) and between none-to weak transferred ( $R_{m1-c} \leq 0.3$ ) and transferred ( $R_{m1-c} > 0.3$ ) metabolites.

| time        | between           | within            |
|-------------|-------------------|-------------------|
| DBS         | 0.02 (-0.02;0.06) | 0.02 (-0.03;0.06) |
| Mom week 1  | 0.01 (-0.03;0.06) | 0.02 (-0.03;0.06) |
| Mom week 24 | 0.02 (-0.03;0.07) | 0.01 (-0.05;0.08) |
